# Supplementary material for: Time from diagnosis to treatment: Are rural cancer patients receiving optimal care in Australia?
Source: Research Square preprint supplement (doi:10.21203/rs.3.rs-6044124/v1), 2025-04-17
Supplement: Supplementary file 1 [file 084374341804b8c200383c79.docx]

**Supplementary Table S2:** Building a logistic regression model for factors associated with a delay between diagnosis and treatment for cancer patients using multiply imputed dataset (*n*=494).

|  | **Odds ratio (OR)a** | | |
| --- | --- | --- | --- |
|  | **Sociodemographic factors** | **Health-related factors** | **Disease or treatment-related factors** |
| **Sociodemographic factors** |  |  |  |
| **Age at diagnosis** |  |  |  |
| <65 years [referent group] | 1.00 | 1.00 | 1.00 |
| ≥65 years | 1.25 | 1.20 | **1.13** |
| **Gender** |  |  |  |
| Male [referent group] | 1.00 | 1.00 | 1.00 |
| Female | 1.05 | 1.09 | **1.34** |
| **Country of birth** |  |  |  |
| Australia [referent group] | 1.00 | - | - |
| Other | 1.30 | - | **-** |
| **Relationship status** |  |  |  |
| Married or with partner [referent group] | 1.00 | **-** | **-** |
| Single, divorced, or widowed | 1.09 | - | **-** |
| **Highest educational level** |  |  |  |
| Secondary school education or below [referent group] | 1.00 | **-** | **-** |
| Tertiary education | 1.08 | - | **-** |
| **Paid employment pre-diagnosis** |  |  |  |
| Yes [referent group] | 1.00 | - | - |
| No | 1.03 | - | **-** |
| **Private health insurance status** |  |  |  |
| Insurance [referent group] | 1.00 | 1.00 | 1.00 |
| No insurance | 1.82* | 1.78* | **1.68*** |
| **Geographical remoteness** |  |  |  |
| Major city or inner regional [referent group] | 1.00 | 1.00 | 1.00 |
| Outer regional or remote | 0.73 | 0.71* | **0.74** |
| **Health-related factors** |  |  |  |
| **Number of comorbidities** |  |  |  |
| None [referent group] | - | 1.00 | 1.00 |
| ≥1 | - | 1.39* | **1.22** |
| **Disease- and treatment-related factors** | |  |  |
| **Cancer type** |  |  |  |
| **Breast cancer** |  |  |  |
| No [referent group] | - | - | 1.00 |
| Yes | - | - | **0.32*** |
| **Head and neck cancer** |  |  |  |
| No [referent group] | - | - | 1.00 |
| Yes | - | - | **0.47*** |
| **Skin cancer** |  |  |  |
| No [referent group] | - | - | 1.00 |
| Yes | - | - | **0.23*** |
| **Prostate cancer** |  |  |  |
| No [referent group] | - | - | 1.00 |
| Yes | - | - | **0.76** |
| **Gastrointestinal cancer** |  |  |  |
| No [referent group] | - | - | 1.00 |
| Yes | - | - | **0.72** |
| **Lung cancer** |  |  |  |
| No [referent group] | - | - | 1.00 |
| Yes | - | - | **1.06** |
| **Gynaecological cancer** |  |  |  |
| No [referent group] | - | - | 1.00 |
| Yes | - | - | **0.77** |
| **Primary treatment modality** |  |  |  |
| Surgery [referent group] | - | - | 1.00 |
| Other therapy | - | - | **1.28** |

OR = odds ratio

1. Bold indicates covariates included in the final model.

**P*-value <0.1.
