# Supplementary material for: Time from diagnosis to treatment: Are rural cancer patients receiving optimal care in Australia?
Source: Research Square preprint supplement (doi:10.21203/rs.3.rs-6044124/v1), 2025-04-17
Supplement: Supplementary file 3 [file 978c5aac4b615bdac6b986a3.docx]

**Supplementary Table S1:** Operationalisation of the recommendations in the Optimal Care Pathways regarding the timeframe between diagnosis and primary treatment for 19 different cancer types.a

1. **Breast cancer**

| Link to pathway: | <https://www.cancer.org.au/assets/pdf/breast-cancer-2nd-edition> |
| --- | --- |
| Cancer types to which pathway was applied: | Breast |
| Recommendations in pathway: | **Treatment:**   - **Surgery:** *Surgery should occur ideally within 5 weeks of the decision to treat (for invasive breast cancer).* - **Chemotherapy and systemic therapy:** *Neoadjuvant chemotherapy should begin within 4 weeks of the decision to treat.* |
| Operationalisation of recommendations: | **Maximum timeframe between diagnosis and treatment:** 5 weeks (surgery) OR 4 weeks (chemotherapy or systemic therapy) |
| Notes: | - It is assumed that ‘decision to treat’ occurs concurrently with diagnosis. - The invasiveness of the cancer and treatment sequence (e.g., adjuvant, neoadjuvant) was unknown. It is assumed that participants who reported surgery as their first treatment had invasive breast cancer and those who reported chemotherapy or other systemic therapies required neoadjuvant therapy. - Unable to apply this pathway for participants whose first treatment modality was unknown or an option other than surgery, chemotherapy, hormone therapy, or immunotherapy. |

1. **Cervical cancer**

| Link to pathway: | <https://www.cancer.org.au/assets/pdf/cervical-cancer-optimal-cancer-care-pathway> |
| --- | --- |
| Cancer types to which pathway was applied: | Cervical |
| Recommendations in pathway: | **Treatment:**   - **Surgery for primary disease:** *Treatment should begin within 4 weeks of the decision to treat.* - **Radiation therapy:** *Treatment should begin within 4 weeks of the decision to treat.* - **Chemotherapy:** *Treatment should begin within 4 weeks of the decision to treat.* |
| Operationalisation of recommendations: | **Maximum timeframe between diagnosis and treatment:** 4 weeks (surgery, radiation therapy, or chemotherapy) |
| Notes: | - It is assumed that ‘decision to treat’ occurs concurrently with diagnosis. - Unable to apply this pathway for participants whose treatment type was unknown or an option other than surgery, radiation therapy, or chemotherapy. |

1. **Colorectal cancer**

| Link to pathway: | <https://www.cancer.org.au/assets/pdf/colorectal-cancer-2nd-edition> |
| --- | --- |
| Cancer types to which pathway was applied: | Colorectal |
| Recommendations in pathway: | **Diagnosis, staging, and treatment planning:**   - **Multidisciplinary team meeting (MDM)****and treatment planning:** *MDM should take place within 2 weeks of diagnosis and staging.*   **Treatment:**   - **Surgery:** *Surgery should be completed within 5 weeks of investigations and MDM if no neoadjuvant therapy required.* - **Neoadjuvant radiation therapy:** *Neoadjuvant radiation therapy should begin within 3 weeks of the MDM.* - **Systemic therapy:** *Neoadjuvant chemotherapy should begin within 3 weeks of the MDM.* |
| Operationalisation of recommendations: | **Maximum timeframe between diagnosis and treatment:** 2 + 5 weeks =7 weeks (surgery) OR 5 weeks (radiation therapy or chemotherapy) |
| Notes: | - The treatment sequence (e.g., adjuvant, neoadjuvant) was unknown. It is assumed that participants who reported radiation therapy or chemotherapy as their first treatment required neoadjuvant therapy, and those who reported surgery as their first treatment did not. - Unable to apply this pathway for participants whose treatment type was unknown or an option other than surgery, radiation therapy, or chemotherapy. |

1. **Endometrial cancer**

| Link to pathway: | <https://www.cancer.org.au/assets/pdf/endometrial-cancer-2nd-edition> |
| --- | --- |
| Cancer types to which pathway was applied: | Endometrial |
| Recommendations in pathway: | **Diagnosis, staging, and treatment planning:**   - **MDM****and treatment planning:** *All newly diagnosed patients should be discussed in a MDM before starting treatment.*   **Treatment:**   - **Surgery:** *Surgery should occur within 4 weeks of the MDM, provided the patient is medically fit.* - **Neoadjuvant radiation therapy:** *Radiation therapy should begin within 6 weeks of the MDM if primary treatment.* - **Systemic therapy:** *Systemic therapy should begin within 6 weeks of the MDM if primary treatment.* |
| Operationalisation of recommendations: | **Maximum timeframe between diagnosis and treatment:** 2 + 4 weeks =6 weeks (surgery) OR 2 + 6 weeks = 8 weeks (radiation therapy or systemic therapy) |
| Notes: | - The recommended timeframe between diagnosis and the MDM was not provided. Therefore, a timeframe of two weeks was applied, as recommended in the pathway for ovarian cancer. It is likely that this timeframe represents a maximum timeframe as ovarian cancer is often diagnosed at a later and more advanced stage. - Unable to apply this pathway for participants whose first treatment modality was unknown. |

1. **Head and neck cancer**

| Link to pathway: | <https://www.cancer.org.au/assets/pdf/head-and-neck-cancer-2nd-edition> |
| --- | --- |
| Cancer types to which pathway was applied: | Head and neck |
| Recommendations in pathway: | **Diagnosis, staging, and treatment planning:**   - **MDM****and treatment planning:** *The first MDM should be within 2 weeks of receiving the diagnosis and staging results.*   **Treatment:**   - **Surgery:** *Surgery should be scheduled within 4 weeks of the MDM.* - **Radiation therapy +/- systemic therapy:** *If radiation therapy or systemic therapy is the primary treatment modality at the time from the MDM to starting treatment, it should begin within 4 weeks for curative intent and within 2 weeks for palliative intent.* |
| Operationalisation of recommendations: | **Maximum timeframe between diagnosis and treatment:** 2 + 4 weeks = 6 weeks (surgery, radiation therapy, or systemic therapy) |
| Notes: | - The intent of treatment (e.g., curative, palliative) was unknown. The recommendation for curative intent was therefore applied as a more conservative timeframe for participants who reported radiation therapy or systemic therapy as their first treatment modality. - Unable to apply this pathway for participants whose first treatment modality was unknown. |

1. **Hepatocellular carcinoma**

| Link to pathway: | <https://www.cancer.org.au/assets/pdf/hepatocellular-carcinoma-2nd-edition> |
| --- | --- |
| Cancer types to which pathway was applied: | Liver |
| Recommendations in pathway: | **Diagnosis, staging, and treatment planning:**   - **MDM****and treatment planning:** *Within 2 weeks of finding a suspected hepatocellular carcinoma, patients should be referred to a specialist multidisciplinary team where possible; the team should have a rapid access program or contact person.*   **Treatment:**   - **Surgery (resection or transplant), local ablative therapies, regional therapies, or localised therapies:** *Treatment should begin within 4 weeks of the MDM.* |
| Operationalisation of recommendations: | **Maximum timeframe between diagnosis and treatment:** 2 + 4 weeks = 6 weeks (surgery, local ablative therapies, regional therapies, or localised therapies) |
| Notes: | - Hepatocellular cancer is the most common form of liver cancer; therefore, this pathway was used to assess participants with liver cancer. - Unable to apply this pathway for participants whose first treatment modality was unknown or an option other than surgery, local ablative therapy, regional therapy, or localised therapy. |

1. **High-grade glioma**

| Link to pathway: | <https://www.cancer.org.au/assets/pdf/high-grade-glioma-2nd-edition> |
| --- | --- |
| Cancer types to which pathway was applied: | Brain |
| Recommendations in pathway: | **Treatment:**   - **Surgery:** *Surgery should occur immediately for most cases or within 4 weeks of diagnosis if not urgent (according to clinical need).* |
| Operationalisation of recommendations: | **Maximum timeframe between diagnosis and treatment:** 4 weeks (surgery) |
| Notes: | - Gliomas are the most common form of brain cancer; therefore, this pathway was used to assess participants with brain cancer. - The urgency of treatment was unknown. The recommendation for non-urgent treatment was therefore applied as a more conservative timeframe for participants who reported surgery as their first treatment modality. - Unable to apply this pathway for participants whose first treatment modality was unknown or an option other than surgery. |

1. **Hodgkin and diffuse large B-cell lymphomas**

| Link to pathway: | <https://www.cancer.org.au/assets/pdf/hodgkin-and-diffuse-large-b-cell-lymphoma-2nd-edition> |
| --- | --- |
| Cancer types to which pathway was applied: | Non-Hodgkin lymphoma, Hodgkin lymphoma |
| Recommendations in pathway: | **Treatment:**   - **Systemic therapy:** *Treatment should begin within 2 weeks of diagnosis and staging.* *In cases with critical organ compromise or rapid clinical progression, it may be necessary to start treatment within 24 hours of diagnosis.* |
| Operationalisation of recommendations: | **Maximum timeframe between diagnosis and treatment:** 2 weeks (systemic therapy) |
| Notes: | - Diffuse large B-cell lymphoma is the most common type of non-Hodgkin lymphoma; therefore, this pathway was used to assess participants with non-Hodgkin lymphoma. - It was unknown whether participants had critical organ compromise or rapid clinical progression. The recommendation of two weeks was therefore applied as a more conservative timeframe for participants who reported systemic therapy as their first treatment modality. - Unable to apply this pathway for participants whose first treatment modality was unknown or an option other than systemic therapy. |

1. **Keratinocyte cancer (basal cell carcinoma or squamous cell carcinoma)**

| Link to pathway: | [keratinocyte-cancer-basal-cell-carcinoma-or-squamous-cell-carcinoma-2nd-edition](https://www.cancer.org.au/assets/pdf/keratinocyte-cancer-basal-cell-carcinoma-or-squamous-cell-carcinoma-2nd-edition) |
| --- | --- |
| Cancer types to which pathway was applied: | Skin (excluding melanoma) |
|  | **Diagnosis, staging, and treatment planning:**   - **MDM****and treatment planning:** *The MDM should be conducted before implementing treatment.*   **Treatment:**   - **Surgery:** *Patients will be prioritised, depending on their particular tumour type and extent but will usually be having active treatment within a 3-month period.* - **Other therapies:** *Treatment should start as soon as diagnosis and staging has occurred and the treatment modality becomes available, ideally within 4 weeks of the MDM.* |
| Operationalisation of recommendations: | **Maximum timeframe between diagnosis and treatment:** 12 weeks (surgery) |
| Notes: | - The pathway provides a usual timeframe between diagnosis and treatment for patients, which presumably constitutes the recommended timeframe. - Unable to operationalise the timeframe between diagnosis and treatment for ‘other therapies’ as the pathway does not state when the MDM should occur. - Unable to apply this pathway for participants whose first treatment modality was unknown or an option other than surgery. |

1. **Lung cancer**

| Link to pathway: | <https://www.cancer.org.au/assets/pdf/lung-cancer-2nd-edition> |
| --- | --- |
| Cancer types to which pathway was applied: | Lung |
| Recommendations in pathway: | **Presentation, initial investigations and referral:**   - **Referral to specialist:** *The specialist (linked to a lung cancer multidisciplinary team) appointment should take place within 2 weeks of the GP referral.*   **Diagnosis, staging, and treatment planning:**   - **Diagnosis and staging:** *Diagnostic tests should be completed within 2 weeks of the first specialist appointment.*   **Treatment:**   - **Surgery, radiation therapy, local ablative therapies, or systemic therapy:** *Treatment should begin within 6 weeks of specialist referral. Medical emergencies should follow guidelines.* |
| Operationalisation of recommendations: | **Maximum timeframe between diagnosis and treatment:** 6 – 2 – 2 weeks = 2 weeks (surgery, radiation therapy, local ablative therapies, or systemic therapy) |
| Notes: | - It was unknown whether there was a medical emergency prior to treatment. The recommendation of 6 weeks between treatment and the specialist referral was therefore applied as a more conservative timeframe. - Unable to apply this pathway for participants whose first treatment modality was unknown. |

1. **Melanoma**

| Link to pathway: | <https://www.cancer.org.au/assets/pdf/melanoma-2nd-edition> |
| --- | --- |
| Cancer types to which pathway was applied: | Melanoma |
| Recommendations in pathway: | **Diagnosis, staging, and treatment planning:**   - **MDM****and treatment planning:** *Appropriate patients should be discussed at an MDM within 4 weeks of initial diagnosis.*   **Treatment:**   - **Surgery:** *Surgery in a primary care setting should occur within 2 weeks of the decision that it is necessary.* - **Radiation therapy:** *If not urgent, radiation therapy should begin within 4 weeks of the MDM. Some patients will require urgent treatment.* |
| Operationalisation of recommendations: | **Maximum timeframe between diagnosis and treatment:** 4 + 2 weeks = 6 weeks (surgery) OR 4 + 4 weeks = 8 weeks (radiation therapy) |
| Notes: | - It is assumed that ‘the decision that [surgery] is necessary’ is made during the MDM. The setting in which participants underwent surgery was unknown. Therefore, it is also assumed that participants were treated in a primary care setting. - The urgency of radiation therapy was unknown. The recommendation for non-urgent treatment was therefore applied as a more conservative timeframe. - Unable to apply this pathway for participants whose first treatment modality was unknown or an option other than surgery or radiation therapy. |

1. **Multiple myeloma**

| Link to pathway: | <https://www.cancer.org.au/assets/pdf/multiple-myeloma-1st-edition> |
| --- | --- |
| Cancer types to which pathway was applied: | Myeloma |
| Recommendations in pathway: | **Treatment:**   - **Systemic therapy:** *Treatment should ideally begin within 2 weeks of confirmed diagnosis, or within 24 hours if there is critical organ compromise or rapid clinical progression.*  1. **Radiation therapy:** *Where possible, radiotherapy should begin within 24 hours of referral if there is critical organ compromise, or within 48 hours of referral if the intent is local pain control. The maximum acceptable waiting period is 48 hours for critical organ compromise and 14 days for pain control. For solitary bone plasmacytoma or extramedullary plasmacytoma where the treatment goal is curative, radiotherapy should start within 14 days of referral where possible, with a maximum acceptable waiting time of 28 days.* |
| Operationalisation of recommendations: | **Maximum timeframe between diagnosis and treatment:** 2 weeks (systemic therapy or radiation therapy) |
| Notes: | - It was unknown whether patients had critical organ compromise or rapid clinical progression prior to treatment. It was also unknown whether patients had solitary bone plasmacytoma or extramedullary plasmacytoma. The recommendation of two weeks for those without solitary bone plasmacytoma or extramedullary plasmacytoma was therefore applied as a more conservative timeframe. - Unable to apply this pathway for participants whose first treatment modality was unknown or an option other than systemic therapy or radiation therapy. |

1. **Myelodysplastic syndrome**

| Link to pathway: | <https://www.cancer.org.au/assets/pdf/myelodysplastic-syndrome-1st-edition> |
| --- | --- |
| Cancer types to which pathway was applied: | Myelodysplastic syndrome (MDS) |
| Recommendations in pathway: | **Treatment:**   - **Specific therapies for lower and higher risk:** *Lower risk MDS treatment is guided by clinical presentation and urgency. Higher risk MDS treatment should begin within 6 weeks of initial specialist consultation. Ongoing close monitoring could be considered depending on the patient’s circumstances.* - **Allogeneic stem cell transplant:** *Guided by clinical presentation and urgency for higher risk and occasionally lower risk MDS. Early referral to transplant is recommended for patients under 70 years of age and with higher risk MDS. However, age-specific frailty score and performance status should be considered.* |
| Operationalisation of recommendations: | NA |
| Notes: | - Unable to operationalise the recommendations as timeframes are guided by clinical presentation and urgency. |

1. **Oesophagogastric cancer**

| Link to pathway: | <https://www.cancer.org.au/assets/pdf/oesophagogastric-cancer-2nd-edition> |
| --- | --- |
| Cancer types to which pathway was applied: | Oesophageal, stomach |
| Recommendations in pathway: | **Diagnosis, staging, and treatment planning:**   - **Diagnosis and staging:** *Staging work-up needs to be complete for presentation at an MDM within 2 weeks of diagnosis.*   **Treatment:**   - **Surgery, radiation therapy, or systemic therapy:** *Treatment should begin within 2 weeks of the MDM.* |
| Operationalisation of recommendations: | **Maximum timeframe between diagnosis and treatment:** 2 + 2 weeks = 4 weeks (surgery, radiation therapy, or systemic therapy) |
| Notes: | NA |

1. **Ovarian cancer**

| Link to pathway: | <https://www.cancer.org.au/assets/pdf/ovarian-cancer-2nd-edition> |
| --- | --- |
| Cancer types to which pathway was applied: | Ovarian |
| Recommendations in pathway: | **Diagnosis, staging, and treatment planning:**   - **Multidisciplinary team meeting and treatment planning:** *The MDM should convene within 2 weeks of a suspected or confirmed diagnosis.*   **Treatment:**   - **Surgery:** *Surgery should be conducted within 4 weeks of the suspected or confirmed diagnosis and within 2 weeks of the MDM.* - **Systemic therapy:** *Neoadjuvant chemotherapy should begin within 2 weeks of the MDM.* - **Radiation therapy:** *Radiation therapy should begin within 4 weeks of the MDM.* |
| Operationalisation of recommendations: | **Maximum timeframe between diagnosis and treatment:** 4 weeks (surgery) OR 2 + 2 weeks = 4 weeks (systemic therapy) OR 2 + 4 weeks = 6 weeks (radiation therapy) |
| Notes: | - The treatment sequence (e.g., adjuvant, neoadjuvant) was unknown. It is assumed that participants who reported systemic therapy as their first treatment required neoadjuvant therapy. - Unable to apply this pathway for participants whose first treatment modality was unknown. |

1. **Pancreatic cancer**

| Link to pathway: | <https://www.cancer.org.au/assets/pdf/pancreatic-cancer-2nd-edition> |
| --- | --- |
| Cancer types to which pathway was applied: | Pancreatic |
| Recommendations in pathway: | **Treatment:**   - **Surgery:** *Surgery should be undertaken within 4 weeks of initial diagnosis, depending on urgency and modality.* - **Systemic chemotherapy or radiation therapy:** *Treatment should begin within 4 weeks of initial diagnosis, depending on urgency and modality.* |
| Operationalisation of recommendations: | **Maximum timeframe between diagnosis and treatment:** 4 weeks (surgery, chemotherapy, or radiation therapy) |
| Notes: | - The urgency of treatment was unknown. The recommendation of 6 weeks was therefore applied as a more conservative timeframe. - Unable to apply this pathway for participants whose first treatment modality was unknown or an option other than surgery, chemotherapy, or radiation therapy. |

1. **Prostate cancer**

| Link to pathway: | <https://www.cancer.org.au/assets/pdf/prostate-cancer-2nd-edition> |
| --- | --- |
| Cancer types to which pathway was applied: | Prostate |
| Recommendations in pathway: | **Treatment:**   - **Surgery:** *Surgery should be conducted within 3 months of diagnosis or within 4 weeks if significant local symptoms are present.* - **Radiation therapy:** *Treatment should begin within 3 months of diagnosis or within 4 weeks if significant local symptoms are present.* - **Androgen deprivation therapy and other systemic therapy:** *Treatment should begin within 3 months of diagnosis if asymptomatic, or within 4 weeks if symptomatic or extensive metastatic disease is present on imaging.* |
| Operationalisation of recommendations: | **Maximum timeframe between diagnosis and treatment:** 12 weeks (surgery, radiation therapy, androgen deprivation therapy, or other systemic therapy) |
| Notes: | - The severity of symptoms at the time of diagnosis was unknown. The recommendation for asymptomatic patients was therefore applied as a more conservative timeframe. |

1. **Sarcoma (bone and soft tissue sarcoma)**

| Link to pathway: | <https://www.cancer.org.au/assets/pdf/sarcoma-bone-soft-tissue-tumours-january-2020> |
| --- | --- |
| Cancer types to which pathway was applied: | Bone, connective tissue |
| Recommendations in pathway: | **Treatment:**   - **Treatment options:** *Patients begin their treatment within three weeks of the decision to treat.* |
| Operationalisation of recommendations: | **Maximum timeframe between diagnosis and treatment:** 3 weeks (any treatment) |
| Notes: | - It is assumed that ‘decision to treat’ occurs concurrently with diagnosis. |

1. **Unknown primary**

| Link to pathway: | <https://www.cancer.org.au/assets/pdf/cancer-of-unknown-primary-january-2020> |
| --- | --- |
| Cancer types to which pathway was applied: | Unknown primary |
| Recommendations in pathway: | **Treatment:**   - **Treatment options:** *Treatment should start within two weeks of the decision to treat.* |
| Operationalisation of recommendations: | **Maximum timeframe between diagnosis and treatment:** 2 weeks (any treatment) |
| Notes: | - It is assumed that ‘decision to treat’ occurs concurrently with diagnosis. |

1. Recommendations for adjuvant therapy not included as recommendations were compared to the first treatment reported by participants.
