# Supplementary material for: Time from diagnosis to treatment: Are rural cancer patients receiving optimal care in Australia?
Source: Research Square preprint supplement (doi:10.21203/rs.3.rs-6044124/v1), 2025-04-17
Supplement: Supplementary file 4 [file d5d4a90693f722c6ba95f6b7.docx]

**Supplementary Material 4:** Final logistic regression model for factors associated with a delay between diagnosis and treatment for cancer patients using the original non-imputed dataset (*n*=434).a

|  | Unadjusted estimates | | Adjusted estimates | |
| --- | --- | --- | --- | --- |
| Variable | OR (95% CI) | *P-*value | OR (95% CI) | *P*-value |
| Age (years) |  |  |  |  |
| <65 years [referent group] | 1.00 |  | 1.00 |  |
| ≥65 years | 1.26 (0.88-1.82) | 0.21 | 1.06 (0.69-1.62) | 0.80 |
| Gender |  |  |  |  |
| Male [referent group] | 1.00 |  | 1.00 |  |
| Female | 0.97 (0.68-1.39) | 0.87 | 1.40 (0.80-2.45) | 0.24 |
| Private health insurance status |  |  |  |  |
| Insurance [referent group] | 1.00 |  | 1.00 |  |
| No insurance | 1.83 (1.15-2.92) | 0.011* | 1.52 (0.91-2.55) | 0.11 |
| Geographical remoteness |  |  |  |  |
| Major city and inner regional [referent group] | 1.00 |  | 1.00 |  |
| Outer regional and remote | 0.66 (0.46-0.95) | 0.026* | 0.65 (0.43-0.97) | 0.035* |
| Number of comorbidities |  |  |  |  |
| None [referent group] | 1.00 |  | 1.00 |  |
| ≥1 | 1.44 (0.99-2.09) | 0.054 | 1.29 (0.85-1.95) | 0.23 |
| Cancer type |  |  |  |  |
| Breast cancer |  |  |  |  |
| No [referent group] | 1.00 |  | 1.00 |  |
| Yes | 0.46 (0.29-0.75) | 0.002* | 0.36 (0.15-0.86) | 0.021* |
| Head and neck cancer |  |  |  |  |
| No [referent group] | 1.00 |  | 1.00 |  |
| Yes | 0.82 (0.51-1.32) | 0.41 | 0.45 (0.20-1.03) | 0.06 |
| Skin cancer |  |  |  |  |
| No [referent group] | 1.00 |  | 1.00 |  |
| Yes | 0.34 (0.17-0.68) | 0.002* | 0.24 (0.09-0.64) | 0.005* |
| Prostate cancer |  |  |  |  |
| No [referent group] | 1.00 |  | 1.00 |  |
| Yes | 1.43 (0.86-2.38) | 0.17 | 0.76 (0.31-1.84) | 0.54 |
| Gastrointestinal cancer |  |  |  |  |
| No [referent group] | 1.00 |  | 1.00 |  |
| Yes | 1.40 (0.82-2.40) | 0.22 | 0.74 (0.31-1.78) | 0.51 |
| Lung cancer |  |  |  |  |
| No [referent group] | 1.00 |  | 1.00 |  |
| Yes | 2.56 (1.31-5.01) | 0.006* | 0.92 (0.34-2.48) | 0.87 |
| Gynaecological cancer |  |  |  |  |
| No [referent group] | 1.00 |  | 1.00 |  |
| Yes | 1.72 (0.89-3.34) | 0.11 | 0.93 (0.34-2.55) | 0.89 |
| Primary treatment modality |  |  |  |  |
| Surgery [referent group] | 1.00 |  | 1.00 |  |
| Other therapyc | 1.82 (1.27-2.62) | 0.001* | 1.29 (0.83-2.00) | 0.26 |

CI = confidence interval
OR = odds ratio

1. The model was statistically significant, χ2(13) = 41.636, *p*<0.001, explaining 12% (Nagelkerke *R2*) of the variance in treatment delay and correctly classifying 64% of cases.
2. Includes radiation therapy, chemotherapy, immunotherapy, and hormone therapy.

* *P*-value <0.05.
